# Supplementary material
Source: PubMed Central journal article supplement (PMC1413685)
Supplement: pnas_0506345103_1.pdf [file pnas_0506345103_1.pdf]

**Table 2. Nucleoporin (nup) homologs and associated fold types**

| Gene name | Yeast  | Human  | Folds                                      |
|-----------|--------|--------|--------------------------------------------|
| yPom34    | Q12445 | NF     | TMH                                        |
| yNdc1     | P32500 | Q9NVZ7 | TMH                                        |
| yPom152   | P39685 | Q6ZU81 | TMH, Cadherin                              |
| vPom121   | NF     | Q9Y2N3 | TMH, FG                                    |
| ySec13    | Q04491 | P55735 | $\beta$ -propeller                         |
| ySeh1     | P53011 | Q96EE3 | $\beta$ -propeller                         |
| yNup145C  | P49687 | P52948 | $\alpha$ -solenoid                         |
| yNup84    | P52891 | Q6PJE1 | $\alpha$ -solenoid                         |
| yNup85    | P46673 | Q8NDI4 | $\alpha$ -solenoid                         |
| yNic96    | P34077 | Q8N1F7 | $\alpha$ -solenoid                         |
| yNup188   | P52593 | Q5SRE5 | $\alpha$ -solenoid                         |
| yNup192   | P47054 | Q92621 | $\alpha$ -solenoid                         |
| yNup120   | P35729 | Q12769 | $\beta$ -propeller, $\alpha$ -solenoid     |
| yNup133   | P36161 | Q8WUM0 | $\beta$ -propeller, $\alpha$ -solenoid     |
| yNup157   | P40064 | O75694 | $\beta$ -propeller, $\alpha$ -solenoid     |
| yNup170   | P38181 | O75694 | $\beta$ -propeller, $\alpha$ -solenoid     |
| yNup82    | P40368 | Q13597 | $\beta$ -propeller, CC                     |
| yNup159   | P40477 | P35658 | $\beta$ -propeller, CC, FG                 |
| yNup49    | Q02199 | vNup54 | FG, CC                                     |
| yNup57    | P48837 | Q7Z3B4 | FG, CC                                     |
| yNsp1     | P14907 | P37198 | FG, CC                                     |
| yNup145N  | P49687 | P52948 | FG, Nup98                                  |
| yNup100   | Q02629 | P52948 | FG, Nup98                                  |
| yNup116   | Q02630 | P52948 | FG, Nup98                                  |
| yNup53    | Q03790 | Q8NFH5 | FG,RRM                                     |
| yNup59    | Q05166 | Q8NFH5 | FG,RRM                                     |
| yNup42    | P49686 | Q53Z40 | FG                                         |
| yNup60    | P39705 | P49790 | FG                                         |
| yNup1     | P20676 | P49790 | FG, zinc-finger (human only)               |
| vNup37    | NF     | Q8NFH4 | $\beta$ -propeller                         |
| vNup43    | NF     | Q8NFH3 | $\beta$ -propeller                         |
| AAAS      | NF     | Q9NRG9 | $\beta$ -propeller                         |
| yNup358   | NF     | P49792 | TPR, RanBD, zinc-fingers, cyclophilin-like |

Fold types for *Saccharomyces cerevisiae* (yeast) and *Homo sapiens* (human) nups: TMH, transmembrane helix; CC, coiled coil; FG, FG repeat; Nup98, the autocatalytic domain of Nup98; RRM, RNA recognition motif; TPR, tetratricopeptide repeat. The presumed orthologs are indicated by their UniProt identifiers (1). NF, not found. y, yeast. v, vertebrate.

1. Bairoch, A., Apweiler, R., Wu, C. H., Barker, W. C., Boeckmann, B., Ferro, S., Gasteiger, E., Huang, H., Lopez, R., Magrane, M., *et al.* (2005) *Nucleic Acids Res.* **33**, D154–D159.
