# Supplementary material
Source: PubMed Central journal article supplement (PMC1413685)
Supplement: pnas_0506345103_2.pdf [file pnas_0506345103_2.pdf]

**Table 3. Protease-sensitive sites of yeast nups**

| Fragment ID      | Band intensity | Mw of fragment | Cleavage site identification approach |               |
|------------------|----------------|----------------|---------------------------------------|---------------|
|                  |                |                | Edman Sequence                        | Mw estimation |
| <b>Nup192-FL</b> |                | ~197           |                                       |               |
| A                | medium         | ~168           | R405                                  |               |
| B                | strong         | ~150           | R579                                  |               |
| C                | medium         | ~104           | R962 and 964                          |               |
| D                | medium         | ~89            | R1118                                 |               |
| E                | weak           | ~66            | K1283 and R1292                       |               |
| <b>Nup188-FL</b> |                | ~202           |                                       |               |
| A                | weak           | ~169           |                                       | D372-D419     |
| B                | strong         | ~149           |                                       | D584-D603     |
| <b>Nup170-FL</b> |                | ~185           |                                       |               |
| A                | medium         | ~170           |                                       | K99-D115      |
| B                | medium         | ~133           | K563                                  |               |
| C                | weak           | ~93            | R876                                  |               |
| D                | medium         | ~65            | K1126 and K1144 (main)                |               |
| <b>Nup157-FL</b> |                | ~178           |                                       |               |
| A                | strong         | ~164           |                                       | R52-K80       |
| B                | medium         | ~148           |                                       | K298-K329     |
| C                | weak           | ~129           |                                       | K466-K487     |
| D                | medium         | ~120           |                                       | K527-R575     |
| E                | medium         | ~104           |                                       | R708-R733     |
| F                | weak           | ~79            |                                       | D929-D952     |
| <b>Pom152-FL</b> |                | ~177           |                                       |               |
| A                | medium         | ~163           |                                       | K108-K117     |
| B                | medium         | ~150           |                                       | R210-K215     |
| C                | medium         | ~133           |                                       | K356-K367     |
| D                | medium         | ~114           |                                       | R518-K543     |
| E                | weak           | ~103           |                                       | K651-K661     |
| <b>Nic96-FL</b>  |                | ~124           |                                       |               |
| A                | weak           | ~113           |                                       | K59-K102      |
| B                | strong         | ~100           |                                       | K152-R198     |
| C                | weak           | ~86            |                                       | K291-K321     |
| D                | weak           | ~75            |                                       | K389-K423     |
| E                | weak           | ~60            |                                       | K514-R546     |
| F                | medium         | ~54            |                                       | R577-R599     |
| G                | medium         | ~49            |                                       | R629-D639     |
| H                | medium         | ~42            |                                       | R704-R724     |
| <b>Nup82-FL</b>  |                | ~108           |                                       |               |
| A                | medium         | ~87            |                                       | D154-D184     |
| B                | strong         | ~52            |                                       | D433-K497     |
| <b>Ndc1-FL</b>   |                | ~92            |                                       |               |
| A                | strong         | ~55            |                                       | R393-D433     |
| B                | medium         | ~33            |                                       | R582-R587     |
| <b>Pom34-FL</b>  |                | ~62            |                                       |               |
| A                | medium         | ~58            |                                       | D33-R63       |

Listed are the sites in the yeast nups most sensitive to the proteases, as shown in Fig. 2. The molecular weight of C-terminal fragments, containing a 26-kDa Protein A tag, was calculated on immunoblot scans using National Institutes of Health IMAGE software. The amino acid residue positions, adjacent to the cleavage site are indicated, where D designates an aspartic

acid, K a lysine, and R an arginine. FL, indicates the full-length Protein A-tagged nup.
